# Supplementary material for: Acinetobacter baumannii Genes Required for Bacterial Survival during Bloodstream Infection
Source: PubMed Central journal article supplement (PMC4863628; doi:10.1128/msphere.00013-15), 2015-11-04
Supplement: sph001160011st5.pdf [file sph001160011st5.pdf]

**Table S3. Bacterial strains and plasmids used in this study**

| <b>Strain/Plasmid</b>            | <b>Genotype/Resistance/Use<sup>a</sup></b>       | <b>Source</b>        |
|----------------------------------|--------------------------------------------------|----------------------|
| <b>Strains</b>                   |                                                  |                      |
| <i>A. baumannii</i> strain 17978 | wild-type                                        | ATCC                 |
| <i>fepA</i> ( <i>AIS_0980</i> )  | 17978 $\Delta fepA::kan^R$                       | This study           |
| <i>fepA</i> <sup>+</sup>         | <i>fepA</i> with PABBR_MCS_ <i>fepA_AIS_0981</i> | This study           |
| <i>feoB</i> ( <i>AIS_0653</i> )  | 17978 $\Delta feoB::kan^R$                       | This study           |
| <i>feoB</i> <sup>+</sup>         | <i>feoB</i> with PABBR_MCS_ <i>AIS_0652_feoB</i> | This study           |
| <i>ddc</i> ( <i>AIS_0568</i> )   | 17978 $\Delta ddc::kan^R$                        | This study           |
| <i>ddc</i> <sup>+</sup>          | <i>ddc</i> with PABBR_MCS_ <i>ddc</i>            | This study           |
| <i>pntB</i> ( <i>AIS_02435</i> ) | 17978 $\Delta pntB::kan^R$                       | This study           |
| <i>pntB</i> <sup>+</sup>         | <i>pntB</i> with PABBR_MCS_ <i>pntB</i>          | This study           |
| <i>Escherichia coli</i> EZTn5    | Source of kanamycin cassette                     | S. Subashchandrabose |
| <b>Plasmids</b>                  |                                                  |                      |
| pUC19                            | amp <sup>R</sup> , cloning mutant construct      | Life Technologies    |
| pAT02                            | Rec <sub>Ab</sub> system, recombineering         | 13                   |
| pKD4                             | kan <sup>R</sup> , source of kanamycin cassette  | 31                   |
| PABBR_MCS                        | amp <sup>R</sup> , cloning for complementation   | 13                   |
| PABBR_MCS_ <i>fepA_AIS_0981</i>  | amp <sup>R</sup> , complementation               | This study           |
| PABBR_MCS_ <i>feoB_AIS_0652</i>  | amp <sup>R</sup> , complementation               | This study           |
| PABBR_MCS_ <i>ddc</i>            | amp <sup>R</sup> , complementation               | This study           |
| PABBR_MCS_ <i>pntB</i>           | amp <sup>R</sup> , complementation               | This study           |

<sup>a</sup>kan, kanamycin; amp, ampicillin/carbenicillin, R, resistant
